# Supplementary material
Source: PubMed Central journal article supplement (PMC4654508)
Supplement: am5b06493_si_001.pdf [file am5b06493_si_001.pdf]

# Supporting Information

## Fast, ultrasensitive detection of reactive oxygen species using a carbon nanotube based-electrocatalytic intracellular sensor

Frankie J Rawson<sup>1\*</sup>, Jacqueline Hicks<sup>1</sup>, Nicholas Dodd<sup>2</sup>, Wondwossen Abate<sup>2</sup>, David J Garrett<sup>3</sup>, Nga Yip<sup>4</sup>, Gyorgy Fejer<sup>2</sup>, Alison J Downard<sup>5</sup>, Kim H R Baronian<sup>6</sup>, Simon K Jackson<sup>2\*</sup>,  
Paula M Mendes<sup>4\*</sup>

<sup>1</sup>Laboratory of Biophysics and Surface Analysis, School of Pharmacy, University of Nottingham, University Park, Nottingham NG7 2RD, UK

<sup>2</sup>School of Biomedical and Healthcare Sciences, University of Plymouth, Portland Square, Drake Circus, Plymouth, Devon PL4 8AA, UK

<sup>3</sup>School of Physics, The University of Melbourne, Victoria 3010, Australia

<sup>4</sup>School of Chemical Engineering, University of Birmingham, Edgbaston, Birmingham B15 2TT, UK

<sup>5</sup>Department of Chemistry, University of Canterbury, Private Bag 4800, Christchurch, New Zealand

<sup>6</sup>School of Biological Sciences, University of Canterbury, Private Bag 4800, Christchurch, New Zealand

\*Corresponding authors: [p.m.mendes@bham.ac.uk](mailto:p.m.mendes@bham.ac.uk), [frankie.rawson@nottingham.ac.uk](mailto:frankie.rawson@nottingham.ac.uk),  
[simon.jackson@plymouth.ac.uk](mailto:simon.jackson@plymouth.ac.uk)

### *Surface stability using cyclic voltammetry*

Two hundred consecutive cyclic voltammograms were performed with ITO-SWCNT-Osbpy electrodes in 50 mM PBS prior to performing any cell studies to ensure a stable surface was obtained. Typical voltammograms obtained can be seen in Fig 1S. There is a significant change in the peak current from the 1<sup>st</sup> and 50<sup>th</sup> scan. By the 200<sup>th</sup> scan the peak current is relatively stable.

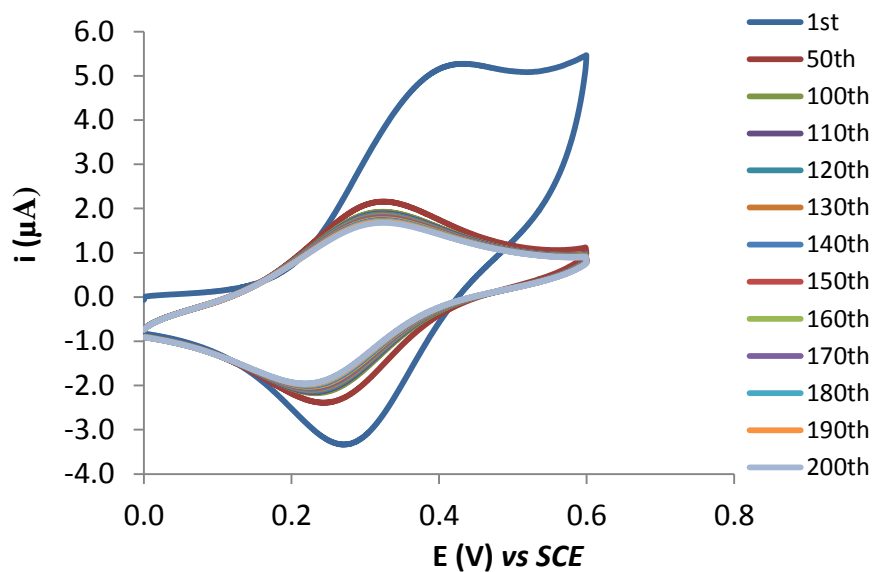

**Fig 1S. Typical cyclic voltammograms obtained for 200 consecutive voltammograms in PBS at an ITO-SWCNT-Osbpy electrode at a scan rate of 100 mV s<sup>-1</sup>.**

### *Cyclic voltammetry on control surfaces: ITO-SWCNT modified electrodes in the presence and absence of H<sub>2</sub>O<sub>2</sub>*

It was important to confirm the H<sub>2</sub>O<sub>2</sub> disproportionation was not occurring due to catalyst contamination used in growing the SWCNTs. Therefore, a cyclic voltammogram was performed in the presence (red curve Fig 2S) and absence of 1 mM H<sub>2</sub>O<sub>2</sub> (blue curve Fig 2S). No faradaic response was observed when a voltammogram was performed in the presence of H<sub>2</sub>O<sub>2</sub> confirming that over the potential range studied, the bare SWCNTs are not catalysing the disproportionation of H<sub>2</sub>O<sub>2</sub>.

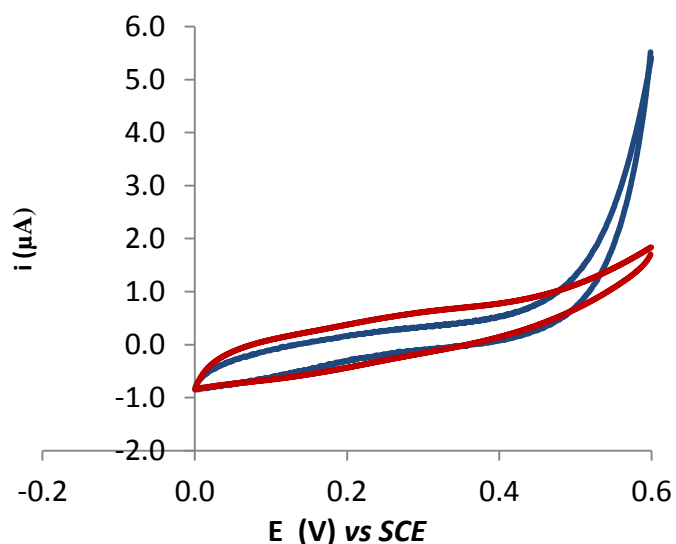

**Fig 2S.** Typical cyclic voltammograms obtained for solution of 50 mM PBS in the presence (red) and absence (blue) of 1mM H<sub>2</sub>O<sub>2</sub> at a scan rate of 5 mV s<sup>-1</sup> at ITO-SWCNT electrodes.

#### *Electrochemical characteristics of the osmium redox couple*

In the absence of H<sub>2</sub>O<sub>2</sub>, peak currents were directly proportional to scan rate (Fig 3S (A)) and is well known to be indicative of a surface bound redox process. If the currents were under the control of diffusion then it would be expected that in a peak current versus scan rate plot the current would be proportional to the square root of scan rate. Investigations into the kinetics of the reaction were performed to provide further insight into the Osbpy catalysed degradation of H<sub>2</sub>O<sub>2</sub> using a cyclic voltammetric scan rate study in the presence of H<sub>2</sub>O<sub>2</sub>. A plot of mean peak current versus scan rate obtained for the osmium redox couple in the absence and presence of H<sub>2</sub>O<sub>2</sub> can be seen in Fig 3S (A) and (B), respectively. Interestingly, in the presence of H<sub>2</sub>O<sub>2</sub> (Fig 3S (B)) there is a deviation from the proportionality with scan rate. If it were a simple case of the peak currents being controlled by the diffusion of H<sub>2</sub>O<sub>2</sub> then a current function plot<sup>1</sup> would yield a line with no gradient. However, on the contrary, a positive slope (Fig 3S (C)) was observed and therefore indicates that the rate limiting step controlling the rate of H<sub>2</sub>O<sub>2</sub> disproportionation is the interaction and electron transfer of the H<sub>2</sub>O<sub>2</sub> with the Osbpy.<sup>2</sup>

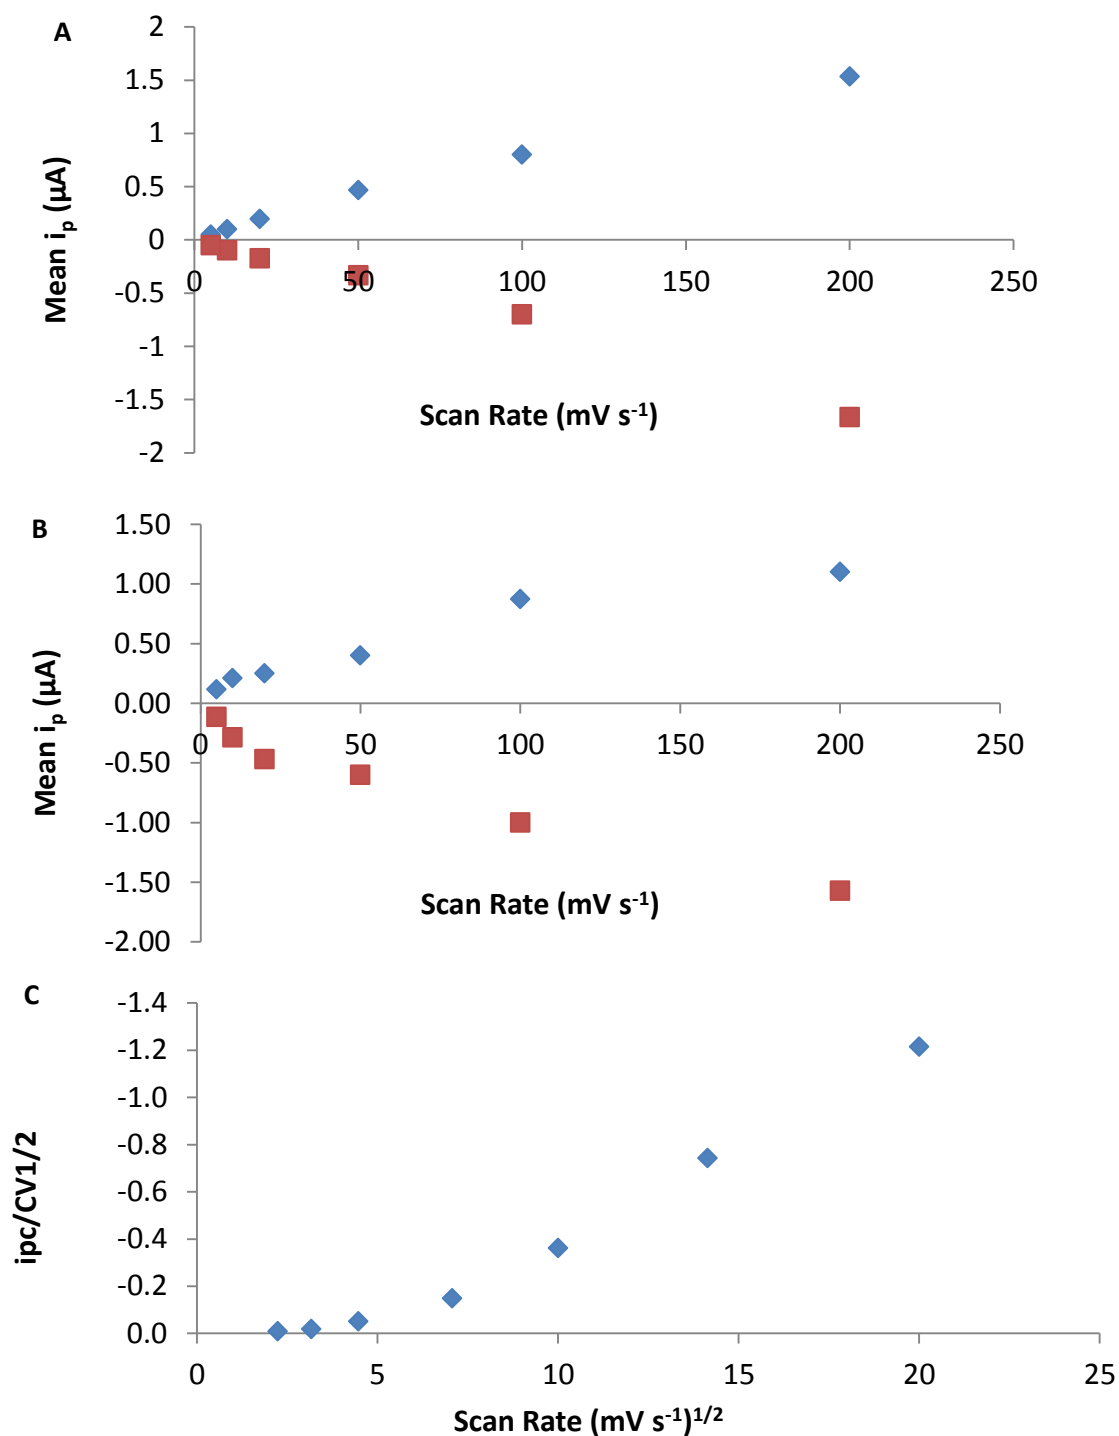

**Fig 3S.** Plots of peak current versus the scan rate obtained from cyclic voltammograms performed in solutions of PBS (A) and in the presence of 100 mM H<sub>2</sub>O<sub>2</sub> (B). (C) Current function plot of the cathodic peak current in the presence of H<sub>2</sub>O<sub>2</sub>. Currents were obtained from cyclic voltammograms (Fig 1 main document) by extrapolating the baseline and measuring the peak height.

### ***Fixed potential amperometry studies using standard additions of H<sub>2</sub>O<sub>2</sub>***

For cellular studies, it was important to show the effect of fixed potential amperometry so that the mechanism for any change in current could be elucidated. Therefore fixed potential amperograms were performed in both PBS (Fig 4S) and culture medium (Fig 5S). To help quantitate the detection ability of the electrode a calibration graph was generated by adding standard additions of H<sub>2</sub>O<sub>2</sub> whilst performing fixed potential amperograms in PBS at 3 electrodes and a typical amperogram can be seen in Fig 4SA. Current was measured after 30 seconds of adding an aliquot of H<sub>2</sub>O<sub>2</sub> and a plot of this versus concentration can be seen in Fig 4SB. A sensitivity value of 59.4  $\mu\text{M nA}^{-1}$  was obtained. A lower limit of detection was calculated by dividing twice the standard deviation of the noise by the sensitivity yielding a theoretical lower limit of detection of 61  $\mu\text{M H}_2\text{O}_2$ . When an amperogram was performed on electrodes exposed to culture medium the background current was no longer cathodic but displayed anodic currents (Fig 5S). This can be attributed to the fact there must be species in the culture medium that undergo oxidation events.

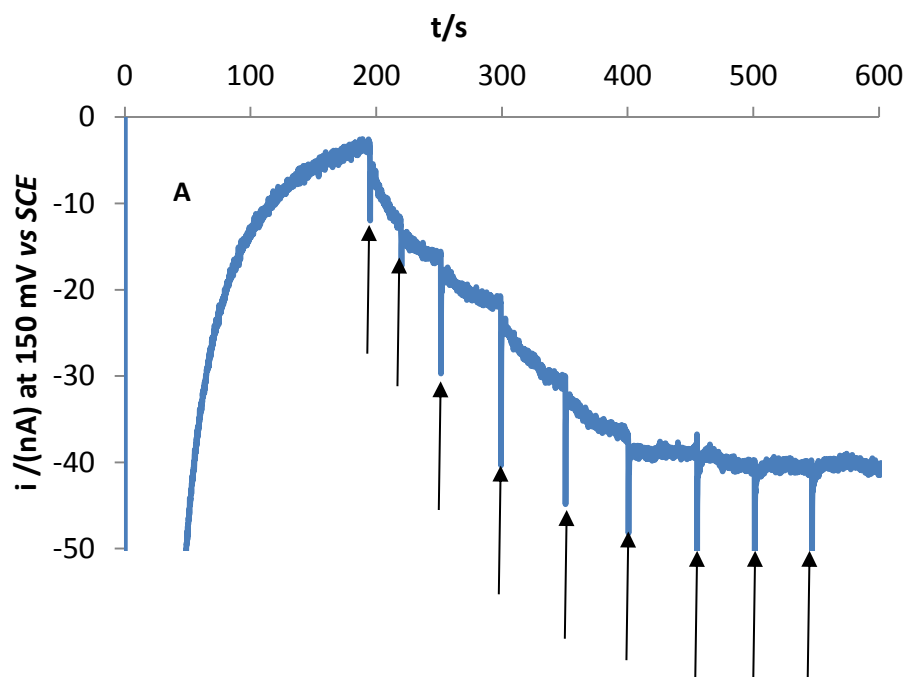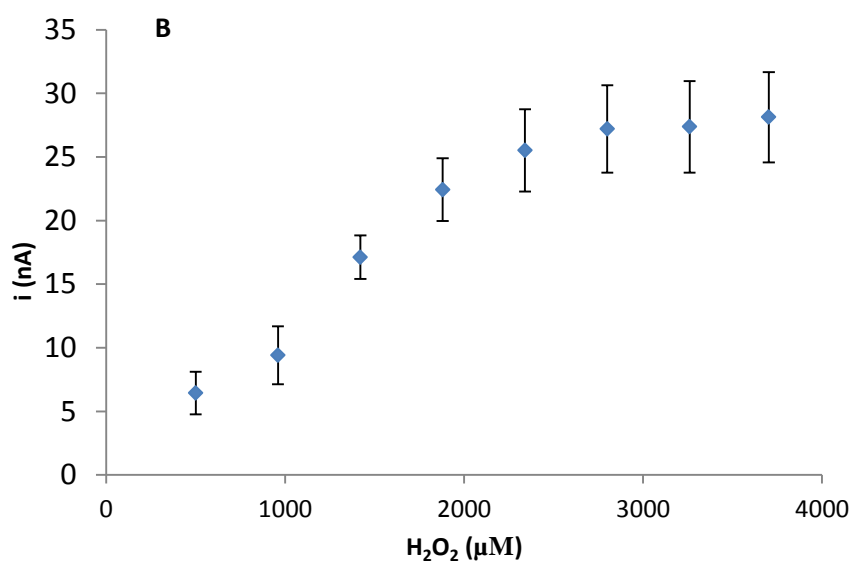

**Fig 4S.** (A) Typical amperogram obtained at an applied potential of 150 mV with standard additions of  $H_2O_2$ . (B) Calibration graph of mean current sampled after 30 seconds of the  $H_2O_2$  addition. ( $n=3$  ITO-SWCNT-Osbpy electrodes. error bars represent  $\pm 1SD$  of the mean)

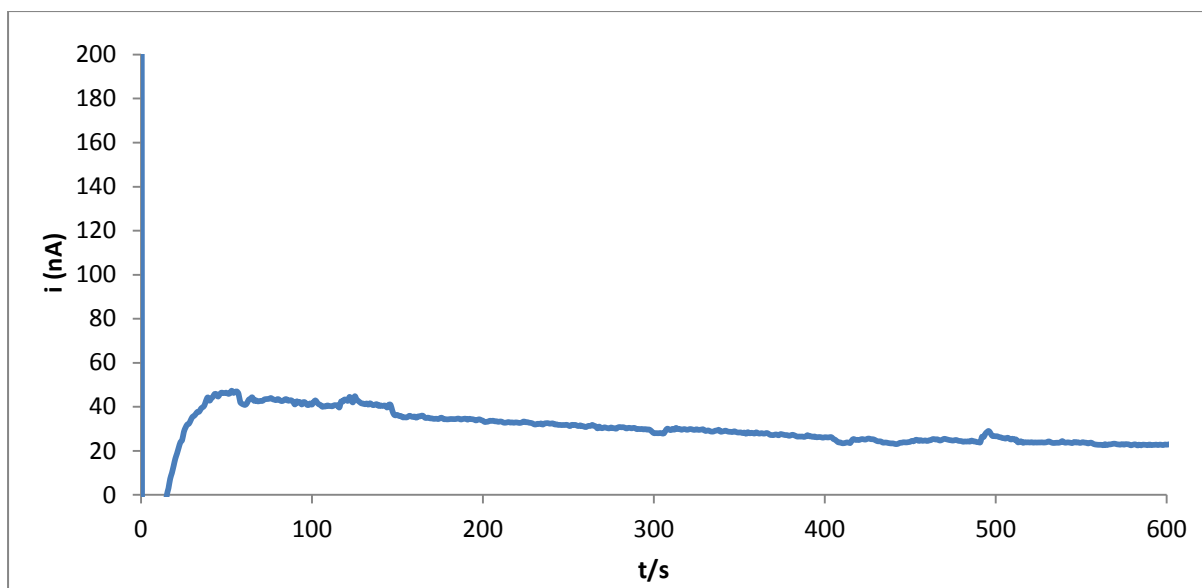

**Fig 5S. Typical amperogram obtained for ITO-SWCNT-Osbpy electrode exposed to culture medium for 60 minutes prior to performing fixed potential amperometry using an applied potential of 150 mV in PBS.**

*Evidence that SWCNT- Osbpy structures are positioned inside the cell*

Evidence that centrifugation of ITO-SWCNT-Osbpy structures enables them to be positioned within the cells is obtained by observing the characteristic methylene blue redox peaks at approximately  $-0.225$  V and  $-0.12$  V. This behaviour is similar to that observed for insertion of SWCNTs DNA modified nanostructures which were shown to be up taken naturally<sup>3</sup>. The control experiment did not display any redox peaks (Figure 6S red curve), providing further support that the voltammetric peaks observed with the ITO-SWCNT-Osbpy electrodes were due to the reduction and oxidation of methylene blue within the cells.

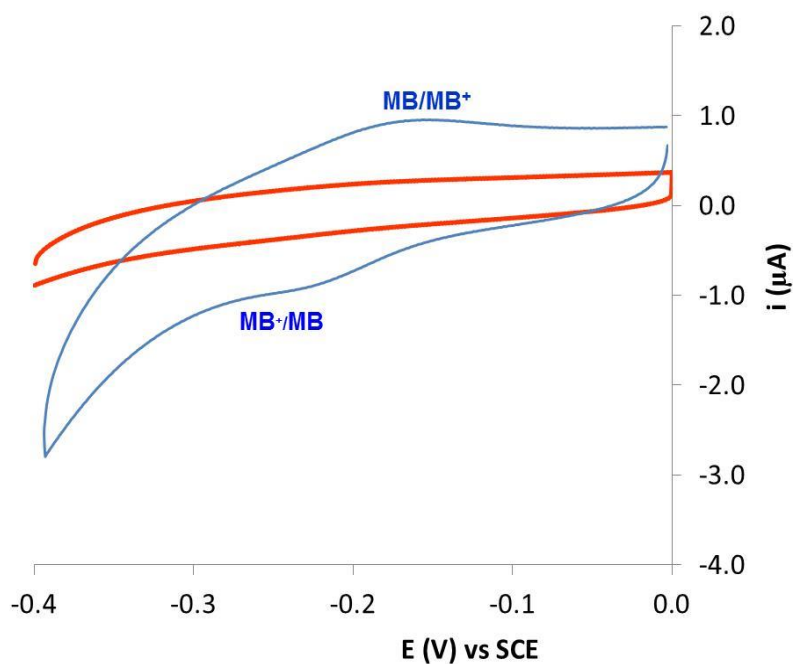

**Fig 6S.** Typical cyclic voltammograms of methylene blue stained cells drop coated (red curve) and centrifuged (blue curve) onto ITO-SWCNT-Osbpy.

*Calculations on the average of H<sub>2</sub>O<sub>2</sub> produced per cell*

In order to calculate the average of H<sub>2</sub>O<sub>2</sub> produced per cell, we performed a cell density study in which cells were centrifuged onto the electrodes and then the average density was calculated from microscopy images giving an average of 529 cells/mm<sup>2</sup> ( $\pm 35$  cells which is  $\pm 1$ SE of the mean n=18). If we then calculate the electroactive area defined by a 4 mm diameter O-ring, using  $\pi r^2$ , this yields a geometric area of 12.57 mm<sup>2</sup>. We can then estimate the number of cells found within the electroactive area by multiplying the mean cell density by the electroactive area which gives a total number of 6650 cells. The mean change in charge observed after addition of the LPS was 34.125 pC. Assuming a 2 electron reduction process for H<sub>2</sub>O<sub>2</sub>, this equates to a total of 0.1768 fmoles of H<sub>2</sub>O<sub>2</sub> being sensed on stimulation with 1  $\mu$ g/mL of LPS. If we divide the number of moles of H<sub>2</sub>O<sub>2</sub> produced by the number of cells covering the defined electrode area (6650), we estimate that a single cell produces 26.59 zmoles of H<sub>2</sub>O<sub>2</sub> in response to LPS stimulation.



### ***Selectivity of the sensor***

The selectivity of the sensor was established by investigating the effect of *in situ* generation of other common reactive moieties including,  $O_2^{\bullet-}$ , and reactive nitrogen species (RNS) including peroxyxynitrite ( $OONO^-$ ), NO (nitric oxide) and nitrite anion ( $NO_2^-$ ) (Figure 7S). Peroxyxynitrite (Cayman chemical company) was stored at  $-80^\circ\text{C}$ .  $ONOO^-$  was defrosted and stored on ice until required. The concentration of the stock was confirmed by measuring at  $OD_{302\text{nm}}$  using a Cecil CE1020 UV spectrometer before every experiment. Stock solutions of  $ONOO^-$  were then diluted in 0.3 M NaOH and stored at  $-20^\circ\text{C}$  for the length of the experiment. An aliquot of  $ONOO^-$  was added to an electrochemical cell comprising PBS operating at an applied potential of 150 mV giving assay concentration of 50  $\mu\text{M}$ . For generation of  $O_2^{\bullet-}$ , an aliquot of  $KO_2$  (Sigma Aldrich) was added to the electrochemical cell to give a final concentration of 50  $\mu\text{M}$  and current was sampled at an applied potential of 150 mV. In order to generate NO and  $NO_2^-$ , a stock solution of DEANONOate (Sigma) was diluted in 0.1 M NaOH and stored on ice throughout the experiment. An aliquot was added to an electrochemical cell comprising PBS operating at an applied potential of 150 mV giving assay concentration of 50  $\mu\text{M}$ .

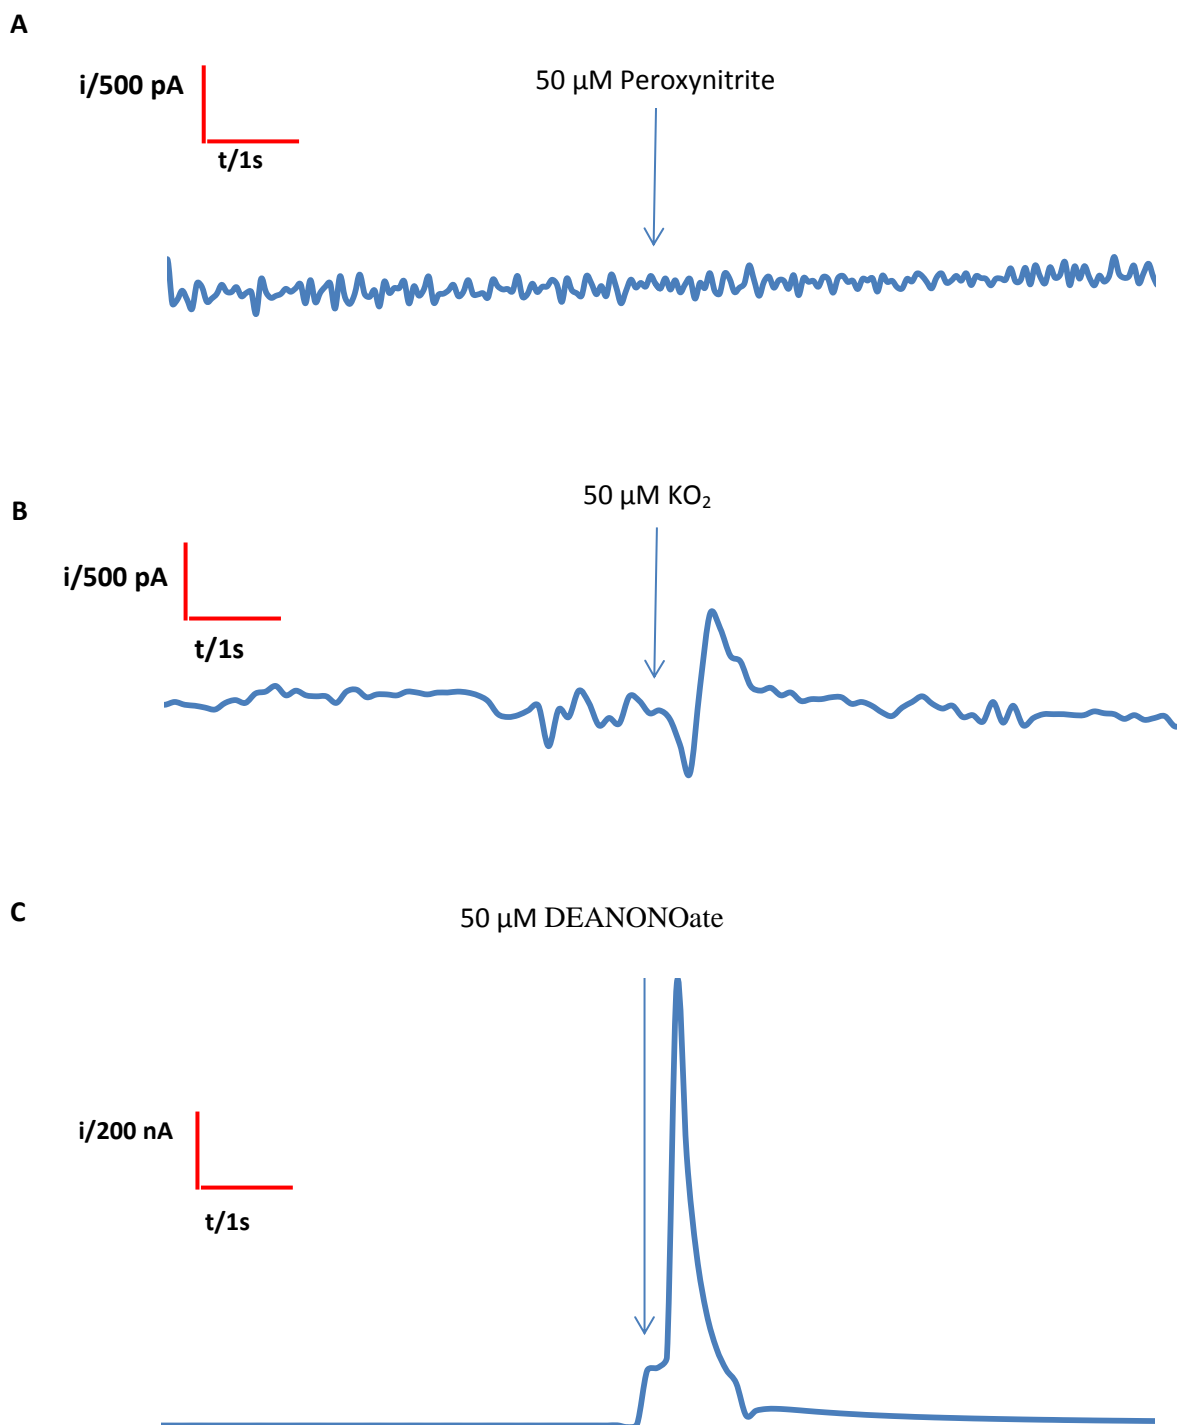

**Fig 7S.** Typical amperogram obtained for ITO-SWCNT-Osbpy electrode exposed to (A) a 50  $\mu\text{M}$  aliquot of peroxynitrite, (B) 50  $\mu\text{M}$   $\text{KO}_2$  and (C) 50  $\mu\text{M}$  DEANONOate at an applied potential of 150 mV in PBS.

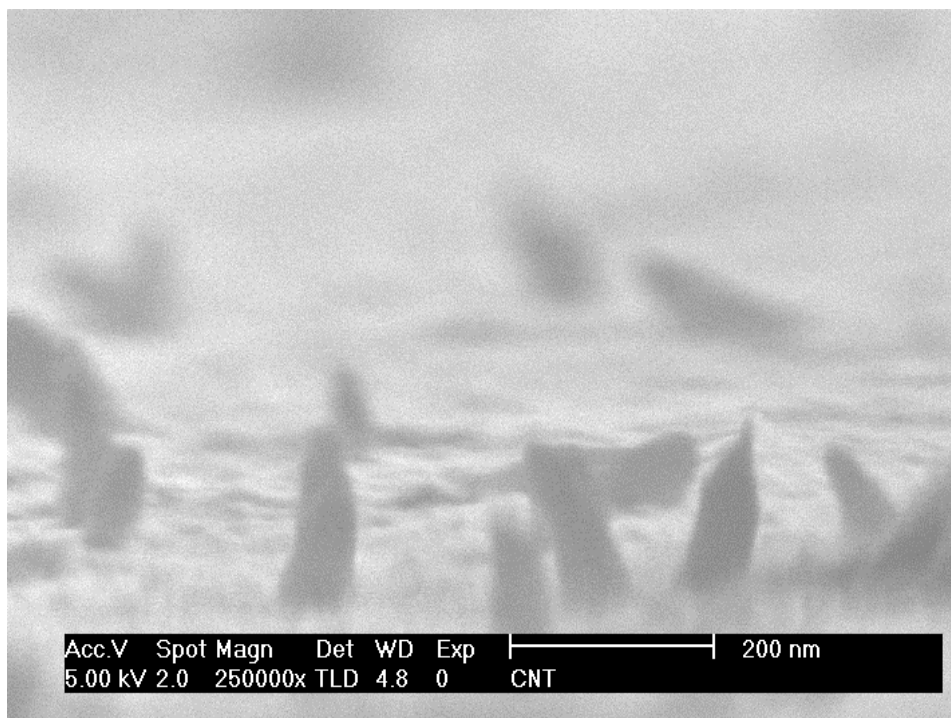

**Fig 8S.** Typical scanning electron micrograph of vertically assembled SWCNTs.

## References

- (1) Nicholson, R. S.; Shain, I. Theory of Stationary Electrode Polarography. Single Scan and Cyclic Methods Applied to Reversible, Irreversible, and Kinetic Systems. *Anal. Chem.* 1964, *36*, 706-723.
- (2) PrévotEAU, A.; Mano, N. Oxygen Reduction on Redox Mediators May Affect Glucose Biosensors Based on “Wired” Enzymes. *Electrochim. Acta* 2012, *68*, 128-133.
- (3) Rawson, F. J.; Yeung, C. L.; Jackson, S. K.; Mendes, P. M. Tailoring 3D Single-Walled Carbon Nanotubes Anchored to Indium Tin Oxide for Natural Cellular Uptake and Intracellular Sensing. *Nano Lett.* 2013, *13*, 1-8.
